# Supplementary material for: Interleukin-18 produced by bone marrow-derived stromal cells supports T-cell acute leukaemia progression
Source: PubMed Central journal article supplement (PMC4203358; doi:10.1002/emmm.201303286), 2014-04-28
Supplement: emmm0006-0821-sd1.pdf [file emmm0006-0821-sd1.pdf]

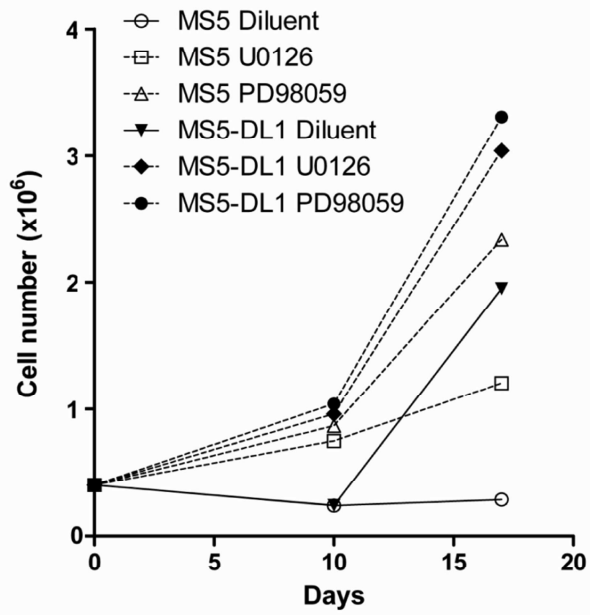

**Figure S1: T-ALL proliferative response to MEK1i.** M18 T-ALL cells ( $4 \times 10^5$  cells/well) were cultured on MS5 or MS5-DL1 stromal cells in the presence of  $20 \mu\text{M}$  U0126 or  $10 \mu\text{M}$  PD98059 for two weeks. Cells were counted by FACS analysis at each time point. Representative of two experiments.
