# Supplementary material for: Interleukin-18 produced by bone marrow-derived stromal cells supports T-cell acute leukaemia progression
Source: PubMed Central journal article supplement (PMC4203358; doi:10.1002/emmm.201303286), 2014-04-28
Supplement: emmm0006-0821-sd2.pdf [file emmm0006-0821-sd2.pdf]

A. OP9

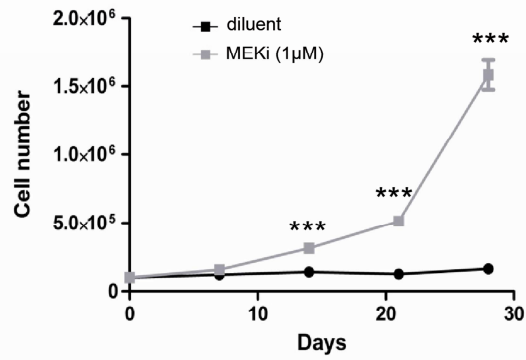

B. Human MSC

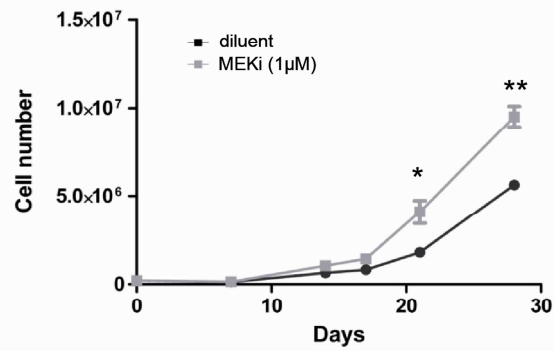

**Figure S2:** Response of T-ALL cell to MEK inhibition during co-cultures with different support cells.  $2 \times 10^5$  T-ALL cells were incubated with OP9 mouse stromal cells (A: M18) or with human mesenchymal stem cells (MSC) (B: M78) in the presence of PD184352 for 28 days. Cells were counted by FACS analysis. \*,  $p < 0.05$ ; \*\*,  $p < 0.005$ , \*\*\*,  $p < 0.0005$  (Mann and Whitney non-parametric test was used for statistics)
