# Supplementary material for: Interleukin-18 produced by bone marrow-derived stromal cells supports T-cell acute leukaemia progression
Source: PubMed Central journal article supplement (PMC4203358; doi:10.1002/emmm.201303286), 2014-04-28
Supplement: emmm0006-0821-sd4.pdf [file emmm0006-0821-sd4.pdf]

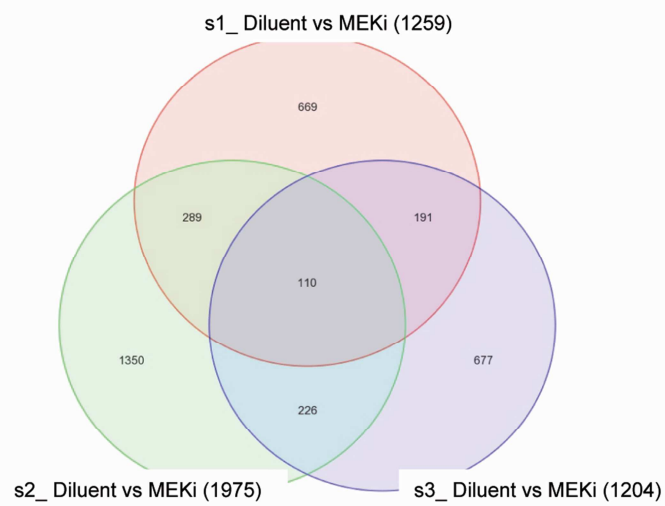

**Figure S4: Micro-array analysis of MS5 cells treated or not with MEKi.** RNA isolated from MS5 cells cultured in the presence of 1 $\mu$ M PD184352 or DMSO (diluent) for 1 week was hybridized to Affymetrix murine Gene1.0 ST arrays according to the manufacturer's instructions. Three (s1, s2, s3) experiments were performed and processed separately. Results were crossed using pair-wise Tukey's post hoc tests that identified a common set of 110 genes.
