# Supplementary material for: Interleukin-18 produced by bone marrow-derived stromal cells supports T-cell acute leukaemia progression
Source: PubMed Central journal article supplement (PMC4203358; doi:10.1002/emmm.201303286), 2014-04-28
Supplement: emmm0006-0821-sd9.pdf [file emmm0006-0821-sd9.pdf]

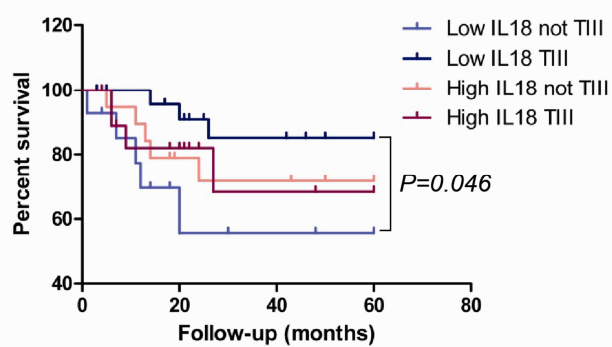

**Figure S9.** Disease-free survival curves of patients with high or low IL18 plasma levels stratified as EGIL TIII and EGIL not-TIII. The significance was analysed using a Cox-regression model.
