# Supplementary material for: Interleukin-18 produced by bone marrow-derived stromal cells supports T-cell acute leukaemia progression
Source: PubMed Central journal article supplement (PMC4203358; doi:10.1002/emmm.201303286), 2014-04-28
Supplement: emmm0006-0821-sd10.pdf [file emmm0006-0821-sd10.pdf]

| <b>Genes</b>    | <b>Forward</b>         | <b>Reverse</b>         |
|-----------------|------------------------|------------------------|
| GAPDH           | GGGAACTGTGGCGTGAT      | GGAGGAGTGGGTGTCGCTGT   |
| $\beta$ 2m      | CACAGCCAAGATAGTTAAGT   | CCAGCCCTCCTAGAGC       |
| mouse IL18      | CAGGCCTGACATCTTCTGCAA  | TCTGACATGGCAGCCATTGT   |
| IL18 R $\alpha$ | TCTTGACCAAAGCTTAACCA   | AAGCAGAGCAGTTGAGCCTTA  |
| IL18 R $\beta$  | TTCCGCATCACATAAGCAAG   | AAAGACCCTTTCAAAGCCAAA  |
| IFN $\gamma$    | ACTGACTTGAATGTCCAACGCA | ATCTGACTCCTTTTTCGCTTCC |

**Table S1:** Sequences of primers used for real-time quantitative PCR
