# Supplementary material for: Interleukin-18 produced by bone marrow-derived stromal cells supports T-cell acute leukaemia progression
Source: PubMed Central journal article supplement (PMC4203358; doi:10.1002/emmm.201303286), 2014-04-28
Supplement: emmm0006-0821-sd11.pdf [file emmm0006-0821-sd11.pdf]

| T-ALL samples | Sex | EGIL maturation stage | White blood cells (G/L) | NOTCH1 mutations | Oncogenic transcripts |
|---------------|-----|-----------------------|-------------------------|------------------|-----------------------|
| M18 R         | M   | Mature                | 102                     | PEST             | SIL-TAL1              |
| M22 R         | M   | Cortical              | 375                     | WT               | NEG                   |
| M30 R         | F   | Cortical              | 110                     | PEST             | NEG                   |
| M34 R         | M   | Mature                | 182                     | PEST             | HOX1f                 |
| M40 R         | M   | Mature                | 485                     | HD               | TAL1                  |
| M69 R         | F   | pre-T                 | 238                     | WT               | SIL-TAL1              |
| M78 R         | M   | Cortical              | 100                     | HD               | MLL-ENL               |
| M80           | F   | pro-T                 | 281                     | PEST             | TLX1                  |
| M82           | F   | Mature                | 184                     | PEST             | LM O2                 |
| M86 R         | M   | Mature                | 5                       | PEST             | NEG                   |
| M87           | M   | pre-T                 | 168                     | nd               | SIL-TAL1/ LM O2       |
| M88           | M   | Mature                | 162                     | nd               | TLX3                  |
| M89           | F   | Mature                | 2                       | nd               | TAL1                  |
| M97 R         | M   | Cortical              | 154                     | nd               | nd                    |
| M100          | M   | Mature                | 244                     | HD               | TLX3                  |
| M105 NR       | M   | Cortical              | 129                     | HD               | TAL1/ LM O2           |
| M106 R        | F   | Mature                | 743                     | WT               | SIL-TAL1/ LM O2       |
| M108 R        | M   | Cortical              | 707                     | HD+PEST          | c-Myb                 |
| M109 NR       | M   | pre-T                 | 115                     | WT               | TAL1/ LM O2 / PTEN    |
| M110 R        | M   | Cortical              | 290                     | PEST             | NEG                   |
| M112 NR       | F   | Mature                | 109                     | WT               | TLX3                  |
| M114 NR       | M   | Cortical              | 362                     | PEST             | NEG                   |
| M118 R        | M   | Cortical              | 460                     | WT               | TAL1/ LM O2 / PTEN    |
| M120 R        | F   | pre-T                 | 439                     | WT               | SIL-TAL1              |
| M121 NR       | F   | pre-T                 | 108                     | WT               | LM O2                 |
| M129 NR       | F   | Cortical              | 7                       | PEST             | NEG                   |

**Table S2:** Summary of the characteristics of the human T-ALL samples used for the experiments described in Figures 1, 2, 3, 4A and 5. Each T-ALL sample was coded (M + number) as mentioned in previous studies (Armstrong, Blood, 2009; Gerby, Leukemia, 2011). R and NR mean respectively MEKi-responsive and non-responsive. Samples without R and NR are samples which did not grow in culture.
