# Supplementary material for: Interleukin-18 produced by bone marrow-derived stromal cells supports T-cell acute leukaemia progression
Source: PubMed Central journal article supplement (PMC4203358; doi:10.1002/emmm.201303286), 2014-04-28

**Figure 2A**  
(left panel)

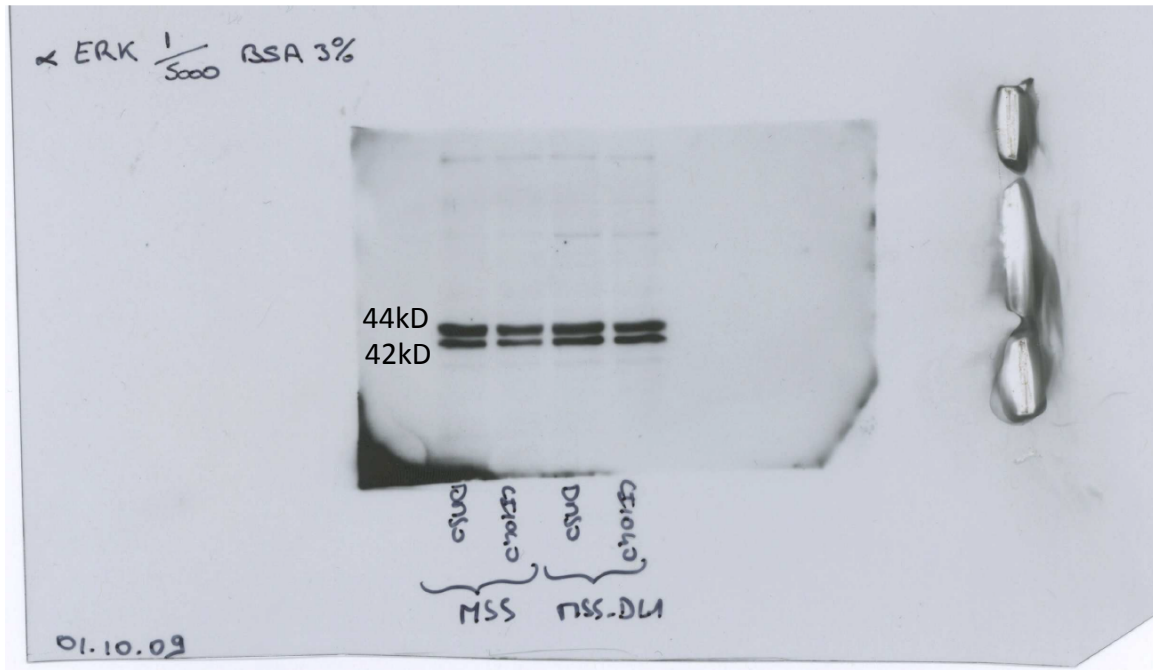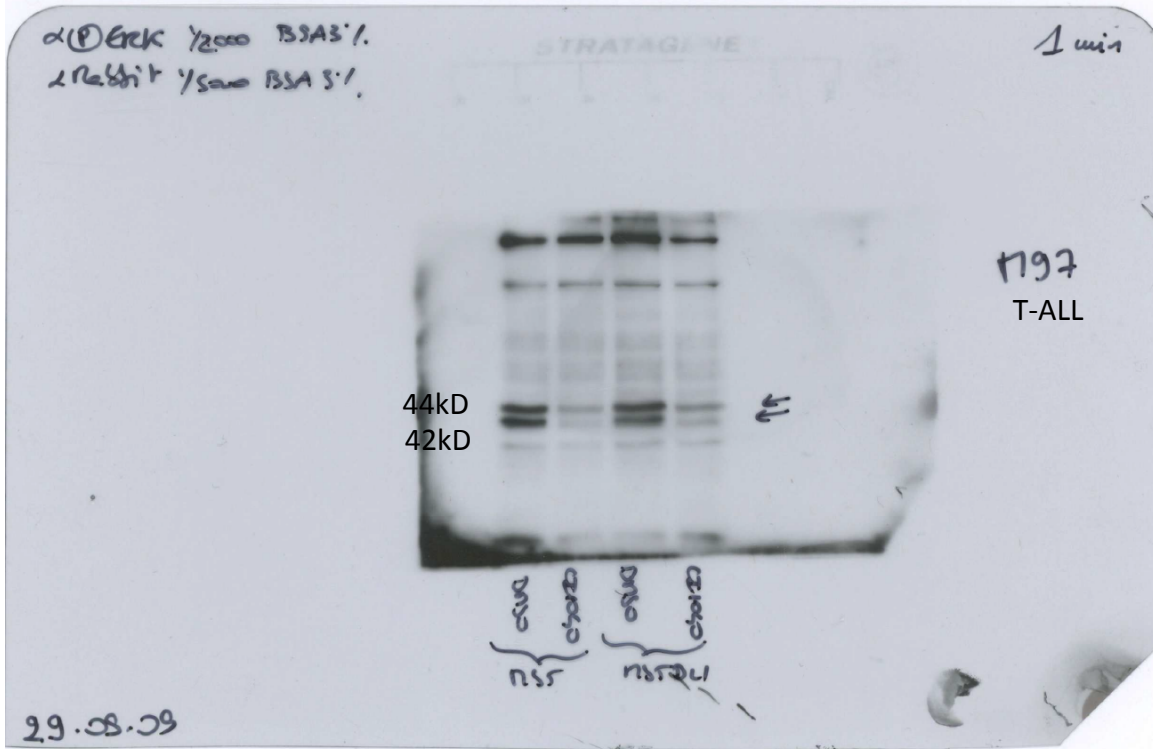

**Figure 2A**  
(right panel)

Western blot on MS5 stromal cells

Total ERK

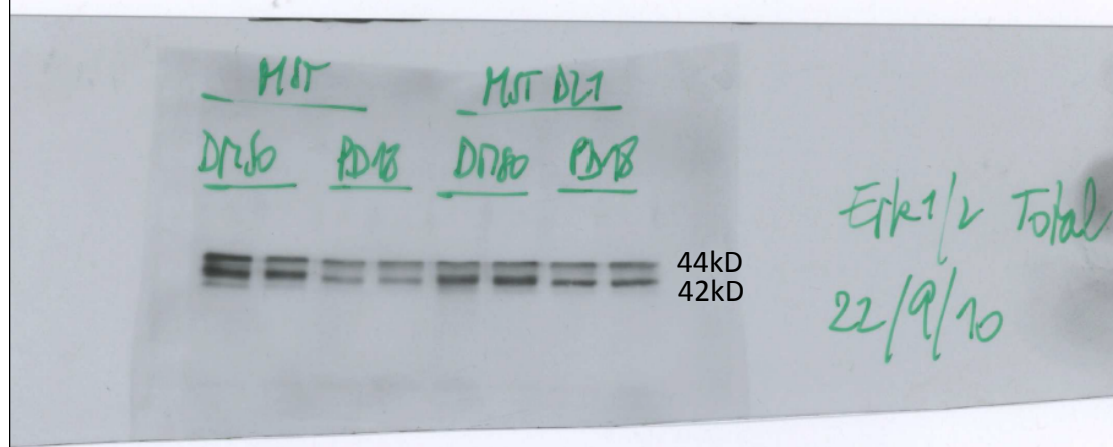

Phospho-ERK

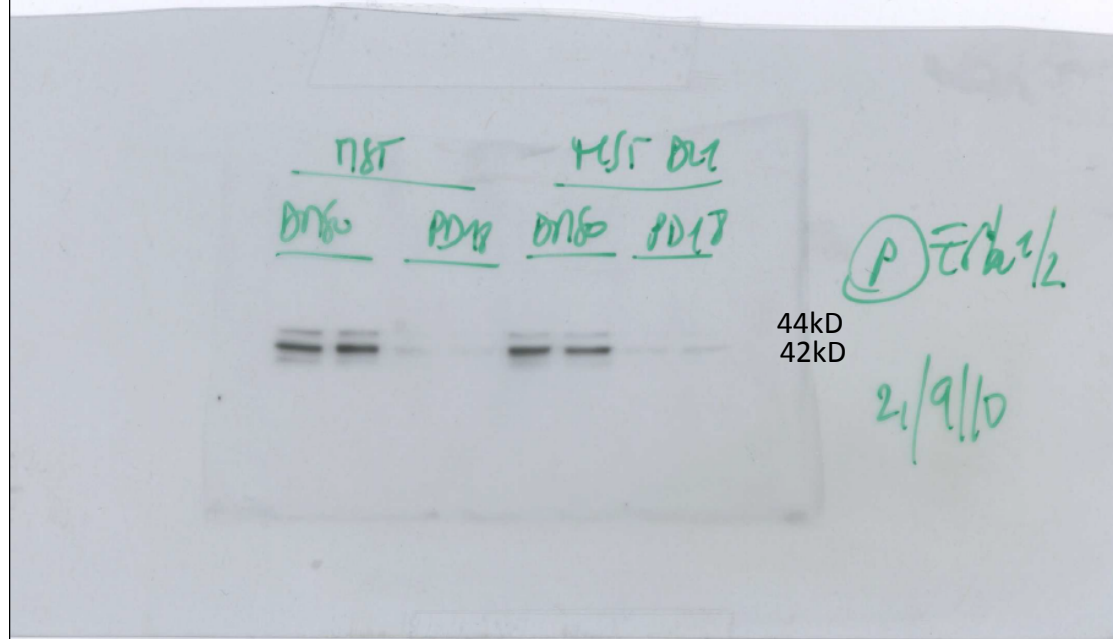

Supplement: emmm0006-0821-sd13.pdf [file emmm0006-0821-sd13.pdf]
